1 **Necrotizing enterocolitis-induced systemic immune suppression in**  
2 **neonatal preterm pigs**

3 Shuqiang Ren<sup>1,2</sup>, Xiaoyu Pan<sup>1</sup>, Yan Hui<sup>3</sup>, Witold Kot<sup>4</sup>, Fei Gao<sup>1,2</sup>, Per T. Sangild<sup>1</sup>, Duc Ninh  
4 Nguyen<sup>1\*</sup>

5 *<sup>1</sup>Section for Comparative Pediatrics and Nutrition, Department of Veterinary and Animal Sciences,*  
6 *University of Copenhagen, Denmark*

7 *<sup>2</sup>Agricultural Genomics Institute at Shenzhen, Chinese Academy of Agricultural Sciences, China*

8 *<sup>3</sup>Department of Food Science, University of Copenhagen, Denmark*

9 *<sup>4</sup>Department of Plant and Environmental Sciences, University of Copenhagen, Denmark*

10

11 Running head: NEC-induced immune suppression

12 \* Corresponding author: Duc Ninh Nguyen, Section for Comparative Pediatrics and Nutrition,  
13 Department of Veterinary Clinical and Animal Sciences, University of Copenhagen, Dyrølægevej 68,  
14 DK-1870 Frederiksberg C, Denmark. Email: [dnn@sund.ku.dk](mailto:dnn@sund.ku.dk)

15

16 **Abstract**

17 **Objectives:** Preterm infants are at high risks of sepsis and necrotising enterocolitis (NEC). Some  
18 develop sepsis shortly after suspected or confirmed NEC, implying that NEC may predispose to  
19 sepsis but the underlying mechanisms are unknown. Using NEC-sensitive preterm pigs as models,  
20 we investigated the immune status in animals with and without NEC. **Methods:** Preterm pigs  
21 (n=113, caesarean delivered at day 106) were reared until day 5 or 9. Blood was analyzed for T cell  
22 subsets, neutrophil phagocytosis, transcriptomics and immune responses to LPS challenge. Gut  
23 tissues were used for histology and cytokine analyses. Pigs with/without macroscopic NEC lesions  
24 were scored as healthy, mild or severe NEC. **Results:** Overall NEC incidence was similar on days 5  
25 and 9 (61-62%) with less severe lesions on day 9, implying gradual mucosal repair following the  
26 early phase of NEC on day 5. Pigs with NEC, especially severe NEC, showed decreased goblet cell  
27 density and increased MPO<sup>+</sup> and CD3<sup>+</sup> cell density in the distal intestine or colon. Circulating  
28 parameters were minimally affected by NEC on day 5, but widely altered on day 9 in pigs with  
29 NEC, especially severe NEC, to the direction of immune suppression. These included elevated Treg  
30 frequency, impaired neutrophil phagocytosis, diminished LPS-induced cytokine secretions and  
31 immune gene responses, and consistently low expressions of genes related to innate immune  
32 signalling and Th1 polarization. **Conclusion:** We shows evidence for NEC-induced systemic  
33 immune suppression, even with mild and sub-clinical NEC lesions, thereby suggesting mechanisms  
34 for increased secondary infections in infants with previous NEC diagnosis.

35 **Key words:** immune development, immune suppression, necrotizing enterocolitis, preterm infants

## 36 **Introduction**

37         Preterm birth (before the completion of 37 weeks of gestation) occurs for approximately 10%  
38 of total pregnancies worldwide and is responsible for multiple early life complications and one  
39 million deaths every year<sup>1</sup>. Preterm infants are particularly susceptible to systemic infection, late-  
40 onset sepsis (LOS) and gastrointestinal diseases, including necrotizing enterocolitis (NEC)<sup>1,2</sup>. For  
41 many decades, these infectious diseases have been speculated to be related to the immature  
42 intestinal and systemic immune system with poor capacity to mount proper response to exogenous  
43 challenges, including gut bacterial colonization and enteral feeding<sup>3-6</sup>. Recently, it has been evident  
44 that the preterm newborn immune system is programmed to a status of disease tolerance with immune  
45 suppression and minimized glycolytic activity<sup>7,8</sup>, which prioritizes cellular energy for maintenance  
46 of organ functions rather than hyper-inflammatory responses<sup>9</sup>. However, when a tolerable threshold  
47 of the immature gut and circulation is exceeded, elevated gut and systemic inflammation may occur  
48 via mucosal and systemic immune activation in an effort to resolve excessive challenges<sup>6</sup>. This  
49 hyper-inflammatory status is typical shortly before and at the diagnostic phase of NEC and LOS in  
50 preterm infants<sup>6,10</sup>.

51         The association of NEC and sepsis with increased systemic inflammation has led to multiple  
52 explorations of diagnostic biomarkers for these diseases<sup>11</sup>. Previous studies in human NEC patients  
53 and animal models have shown that NEC progression is associated with the elevated fraction of  
54 systemic IL-17 producing Treg<sup>12</sup> and increased levels of acute phase molecules (SAA, IL-6, IL-8,  
55 CRP)<sup>13</sup>, as well as diminishment of systemic anti-inflammatory molecules (e.g. TGF- $\beta$ 2)<sup>14</sup>. Similar  
56 host responses are also observed for LOS<sup>15</sup>. Of note, septic neonatal and elderly patients gradually  
57 develop immunosuppression after diagnosis, which predispose to increased risks of secondary  
58 infection and organ failures<sup>16,17</sup>. However, it is unknown whether NEC patients following surgery  
59 or medical treatment also possess an immune suppressive status that may predispose them to  
60 secondary infection and sepsis.

61 At clinical diagnosis of NEC, antibiotics are indispensably treated to decrease gut bacterial  
62 overgrowth and translocation<sup>18,19</sup>. Some of the NEC patients recovering from medical treatments or  
63 surgery later develop LOS, suggesting bacterial translocation from the compromised gut barrier to  
64 the circulation preceding LOS<sup>20,21</sup>. However, it is also possible that NEC lesions or the  
65 interventions associated with NEC including antibiotics alters the systemic immune system, thereby  
66 together with gut bacterial translocation predisposing to LOS. Long-term usage of antibiotics are  
67 well-known to suppress immune functions and increase infection risks<sup>22,23</sup>. However, it remains  
68 elusive if NEC or antibiotic treatment at clinical NEC diagnosis can separately induce immune  
69 suppression and predispose to secondary infection and sepsis.

70 Investigation of the isolated effects of NEC on immune status is not possible in preterm  
71 infants as it is considered unethical not to treat NEC patients with antibiotics. Alternatively, the  
72 preterm pig is well-acknowledged as a clinically relevant model of NEC because it assimilates most  
73 complications in preterm infants including impaired mucosal and systemic immune system,  
74 immature organ functions and spontaneous NEC development following formula feeding<sup>3-5,24</sup>. In  
75 addition, it is possible to induce sub-clinical NEC lesions with various severities in formula-fed  
76 preterm pigs and further rear them without antibiotic treatment<sup>25</sup>, in order to investigate the isolate  
77 NEC effects on organ systems. Based on this background, we hypothesized in the current study that  
78 NEC lesions induce systemic immune suppression in preterm neonates, thereby impairing immune  
79 competence against secondary infectious challenges. To test the hypothesis, we reared preterm pigs  
80 with bovine milk diets to induce sub-clinical NEC at various degrees of severity (mild or severe,  
81 based on macroscopic lesions) and investigate their systemic immune status.

## 82 **Results**

### 83 **Gut inflammation associated with NEC**

84 With similar feeding regimes across ten litters, 36/113 pigs were planned for euthanasia on d  
85 5 and the remaining pigs were reared until d 9. All pigs in the cohort survived until the planned  
86 euthanasia without severe clinical symptoms. Sub-clinical NEC, diagnosed from the macroscopic  
87 scoring at euthanasia, appeared in 22/36 pigs (61%) on day 5 and 48/77 pigs (62%) on d 9 without  
88 statistical significance ( $P = 0.53$ , Fig. 1A-B). In contrast, the incidence of severe NEC was reduced  
89 on d 9, relative to d 5 (16/77, 21% vs. 15/36, 42%,  $P < 0.05$ , Fig. 1B). This suggests that NEC  
90 lesions were already induced on d 5 in these pigs and partly healed in the following days. This  
91 phenomenon may be similar to that in formula-fed preterm infants with possible sub-clinical lesions  
92 gradually being healed without clinical symptoms<sup>26,27</sup>.

93 Pigs with mild and severe NEC showed numerically higher values of gut permeability than  
94 their healthy littermates on d 5, but not d 9 (Fig. 1C), supporting the data of less severe NEC after d  
95 5. All tested inflammatory cytokines in the distal small intestine did not show any differences at any  
96 time points between pigs with vs. without NEC (Fig. 1D) but interestingly IL-6 and TNF- $\alpha$  levels in  
97 colon tissues on d 9 were lower in pigs with mild and severe NEC, relative to those without NEC ( $P$   
98  $< 0.05$ , Fig. 1E). Gut morphology via H&E staining showed no differences in villus height at both  
99 time points (Fig. 1F), but crypt depth values were higher in pigs with NEC, especially severe NEC,  
100 vs. without NEC ( $P < 0.05$ , Fig. 1G).

101 Histological data revealed a drop in mucin-containing goblet cell density in the colon of pigs  
102 with NEC ( $P < 0.01$ ), especially severe NEC ( $P < 0.05$ ), on d 5 but not d 9 (Fig. 2A-D). No  
103 difference in goblet cell density was detected in the distal small intestine. On d 9, the density of  
104 MPO-positive cells (neutrophils/macrophages) tended to be higher in the distal small intestine of  
105 pigs with vs. without NEC ( $P = 0.1$ ), while it was much higher in the colon of pigs with severe vs.

106 mild or no NEC ( $P < 0.01$ , Fig. 2F-H). For the intensity of CD3-positive cells (T lymphocytes) on d  
107 9, there was no difference in the distal small intestine but higher values in pigs with severe vs. mild  
108 NEC in the colon ( $P < 0.05$ , Fig. 2I-L). No differences in levels of MPO- or CD3-positive cells in  
109 any of the investigated regions among the groups were found on d 5 (data not shown).

## 110 **Gut microbiome**

111 Gut microbiome, analyzed by 16S rRNA gene amplicon sequencing, was similar between  
112 pigs with vs. without NEC on both d 5 and 9, as assessed by Shannon alpha diversity (Fig. 3A), beta  
113 diversity with both unweighted and weighted Unifrac dissimilarities (Fig. 3B-C). Taxonomic  
114 comparison using ANCOM analysis showed dominant bacteria belonging to Enterobacteriaceae  
115 family on d 5 and dominant *Enterococcus* spp. on d 9 without any differences between pigs with vs.  
116 without NEC (Fig. 3D). This is in agreement with previous reports demonstrating no major  
117 significant association of gut microbiota alteration with NEC in human NEC patients during the  
118 first 4 weeks of life<sup>28</sup>.

## 119 **Systemic immune status associated with NEC**

120 To evaluate the systemic immune status associated with NEC at different time points, we  
121 compared pigs without vs. with mild vs. with severe NEC lesions with regards to their  
122 hematological profiles, various T cell subsets including blood regulatory T cells (Treg), neutrophil  
123 phagocytosis function, and cytokine secretion and gene expression in response to *ex vivo* whole  
124 blood challenge with LPS. Blood neutrophil counts on d 5 showed tendency to be higher in pigs  
125 with vs. without NEC ( $P = 0.06$ ) and significantly higher in pigs with severe NEC ( $P < 0.05$ ), but no  
126 difference among groups were detected later (d 9, Fig. 4A). Combined with data showing increased  
127 MPO-positive cells in the gut of pigs with NEC, especially severe NEC on d 9, the blood neutrophil  
128 data suggest more neutrophil production from the bone marrow at early phase of severe NEC and  
129 those cells gradually home to the gut at a later time point. Despite having similar neutrophil counts,  
130 pigs with severe NEC on d 9 showed lower number of neutrophils having phagocytic capacity than

131 those without NEC ( $P < 0.05$ , Fig. 4B), indicating poorer innate immune functions at post-  
132 diagnosed NEC phase. Further, whole blood LPS challenge assay showed that TNF- $\alpha$  levels both  
133 before and after LPS challenge on d 9, but not d 5, was lower in pigs with vs. without NEC ( $P =$   
134  $0.09$  and  $< 0.05$ , respectively, Fig. 4C). No differences among groups were detected for IL-10  
135 levels, except the increased levels after vs. before LPS stimulation (all  $P < 0.05$ , Fig. 4D). These  
136 data suggest systemic immune suppressive status or impaired Th1 response following NEC  
137 occurrence. This was supported by the data of immune suppressive cell subset Treg fraction  
138 ( $CD3^+CD4^+Foxp3^+$ ) showing no difference among groups on d 5 but significantly higher in those  
139 with vs. without NEC on d 9 ( $P < 0.01$ , Fig. 4E). These trends were also associated with lower levels  
140 of serum glucose in pigs with severe NEC ( $P < 0.05$ ) only on d 9, but not d 5 (Fig. 4F). No or minor  
141 differences among groups were detected for the remaining hematologic parameters, fraction of T  
142 cells, helper T and cytotoxic T cells (Supplementary Table S4).

143 We also examined a series of genes related to innate and adaptive immune responses  
144 following LPS challenge in whole blood on d 5 and 9 (Fig. 5 and Supplementary Table S5). On  
145 both d 5 and 9, pigs without NEC or mild NEC showed capacity to mount immune responses, when  
146 comparing LPS vs. no LPS stimulation (for 17/23 genes: *TLR2*, *TLR4*, *HIF1A*, *S100A9*, *TNFA*,  
147 *CXCL9*, *CXCL10*, *IL4*, *IL6*, *IL10*, *IFNG*, *TGFB1*, *HK1*, *PDHA1*, *PKM*, *RORC*, *PPARA*,  $P < 0.05$  or  
148  $0.01$  or  $0.001$ , Fig. 5A-B, Supplementary Table S5). In contrast, pigs with severe NEC showed no  
149 responses to LPS stimulation for most of the investigated genes. When comparing gene expressions  
150 among the three groups (no NEC, mild or severe NEC) on d 5, most of the investigated genes  
151 showed no differences, except minor differences before LPS stimulation in *TLR2* and *S100A9* levels  
152 (Fig. 5A-B). Different from d 5, blood immunity gene expressions on d 9 consistently showed  
153 lower levels in pigs with NEC (either mild or severe or pooled mild and severe) vs. without NEC  
154 both before and after LPS stimulation. The trends applied to *TLR2*, *TLR4*, *S100A9*, *TNFA*, *IL4* and  
155 *IL10* before LPS stimulation, and *TLR2*, *HIF1A*, *S100A9*, *TNFA* and *IL10* after LPS stimulation

156 (Fig. 5A-B). Collectively, both FACS and neutrophil functions, cytokine and qPCR data indicate  
157 increased immune suppression in pigs at post-diagnosed phase of NEC on d 9, but not d 5.

### 158 **Blood transcriptomic profile associated with NEC**

159 As differences in systemic parameters between pigs with vs. without NEC were mainly  
160 detected on d 9, we randomly selected 5 pigs with and 5 without NEC (matched control from the  
161 same litter) for blood transcriptomics to further profile possible immune-metabolic pathways  
162 associated with the immune suppressive status in NEC pigs. We identified 684 DEGs between pigs  
163 with vs. without NEC, with 378 down-regulated genes and 306 up-regulated genes in NEC pigs  
164 (Fig. 6A, Supplementary Table S1). Enrichment analyses demonstrated that NEC pigs showed  
165 down-regulated pathways related to both innate immunity and adaptive immunity (T cell receptor  
166 and JAK-STAT signaling, TNF signaling, chemokine signaling, Fig. 6B, Supplementary Table S2).  
167 Conversely, no pathways associated with up-regulated DEGs by NEC were enriched. Gene  
168 interaction network analysis among all DEGs showed top 10 key hub genes (based on betweenness)  
169 involved in TLR, IFN-gamma, neutrophil and T cell signaling (*CCR5*, *SOCS1*, *IGF2R*, *PIK3API*),  
170 energy production via oxidative phosphorylation (*ATPIA1*, *SOD2*) and 9 out of 10 hub genes were  
171 down-regulated in NEC pigs (Fig. 6C). Of note, NEC pigs also showed up-regulation of a series of  
172 genes associated with immune suppression, e.g. *TGFA*, *TGFBI*, *SMAD7*, involved in TGF- $\beta$   
173 signaling (Fig. 6D, Supplementary Table S1).

174



## 175 **Discussion**

176 Gut bacterial translocation has recently been discussed as one of the main routes inducing  
177 bacteremia and sepsis<sup>29,30</sup>. In both septic preterm infants and animals, bacteria identified from  
178 positive blood cultures are often associated with the most abundant taxonomic groups in the gut  
179 microbiome<sup>10,21,31</sup>. Enteral administration of virulent bacterial strains also leads to bacterial  
180 translocation into the circulation and many systemic organs causing LOS<sup>32</sup>. The compromised and  
181 leaky gut barrier in NEC conditions may facilitate bacterial translocation and can be one of the  
182 reasons explaining that a fraction of NEC patients later experience one or more episodes of  
183 LOS<sup>20,21</sup>. Now with the current study, we provided evidence for NEC lesions programming the  
184 systemic immune system to a status of immune suppression, which may together with gut bacterial  
185 translocation contribute to the increased susceptibility to secondary infection and LOS in patients  
186 with antecedent NEC suspicion or diagnosis.

187 With multiple data collected at two different time points on d 5 and d 9, we were able to  
188 evaluate NEC incidence and severity during progression of the disease. Importantly, NEC incidence  
189 diagnosed by macroscopic lesions at euthanasia was identical on d 5 and d 9, suggesting that NEC  
190 found on d 9 had likely already occurred on d 5, and that the mucosal and systemic status on d 9  
191 was a reflection of NEC effects. Strikingly, the severity of NEC lesions on d 9 was clearly less  
192 severe than on d 5, indicating the sub-clinical NEC lesions in some preterm pigs being resolved  
193 gradually. This important observation supports the fact that up to 70% of patients diagnosed with  
194 NEC recover over time without the needs of surgery<sup>26,27</sup>. It is possible that antibiotic treatment in  
195 some NEC cases associated with bacterial overgrowth may release the burden of high bacterial load  
196 in the gut, but the healing of NEC lesions may also occurs via specific host responses to avoid  
197 necrosis requiring surgery.

198 NEC lesions in preterm pigs here were characterized with decreased gut mucin-containing  
199 goblet cell density and increased blood neutrophil counts at early phase on d 5, followed by an  
200 infiltration of neutrophils and/or macrophages (MPO<sup>+</sup> positive cells) and T lymphocytes (CD3<sup>+</sup>  
201 lymphocytes) at later phase on d 9. These tendencies were even more significant in those pigs with  
202 more severe NEC lesions. These phenomena may reflect the innate immune defense from goblet  
203 cells releasing mucin as well as signaling from the gut inflammation priming granulopoiesis in early  
204 phase of NEC, followed by gut-homing immune cells at later phase on d 9. The influx of immune  
205 cells found in NEC tissues in our study were in line with many other NEC models in rodents<sup>33,34</sup>.  
206 Additionally, NEC occurrence during the first 9 days of life in our study was not associated with  
207 any changes in the composition of gut microbiota at either time points. This is consistent with  
208 previous reports showing no association between NEC occurring during the first month of life of  
209 very preterm infants and their gut microbiome compositions<sup>10,28</sup>. Importantly, changes in gut  
210 microbiome preceding NEC (increase in abundance of Gammaproteobacteria and decreased  
211 diversity) only occurred after the first month of life in preterm infants born at or before 27 weeks of  
212 gestation<sup>28</sup>. As gestational age at birth is disproportionally correlated with the age at NEC onset<sup>35</sup>,  
213 NEC occurrence during the first month of life, when bacterial colonization is extremely dynamic,  
214 may be more determined by the balance between the immune competence and bacterial overgrowth  
215 rather than by colonization of specific bacterial groups.

216 Many studies have characterized the changes of blood and gut cell subsets few days before or  
217 at the time of NEC diagnosis and showed increased numbers of inflammatory cells (gut CD4<sup>+</sup> T  
218 effector memory cells, blood IL-17 producing Treg and CCR9<sup>+</sup>CD4<sup>+</sup> T cells) or decreased numbers  
219 of immune suppressive cells subsets (gut Treg)<sup>12,36-38</sup>. The status at those NEC phases likely reflect  
220 the active immune responses of the host in an effort to resolve occurring gut inflammation. This is  
221 similar to the increased levels of inflammatory cytokines at the time close to diagnosis of LOS in  
222 preterm infants<sup>16</sup>. In contrast, the immune status following NEC diagnosis has not been focused.

223 Now with the current study, we observed that preterm pigs with NEC on d 9, but not d 5, showed  
224 increased number of blood Treg, decreased frequency of phagocytic neutrophils as well as  
225 impairment of LPS-induced cytokine secretion and mRNA responses for genes related to innate and  
226 adaptive immunity in whole blood. The transcriptomic profile of NEC pigs on d 9 also  
227 demonstrated clear depression of pathways related to innate immune signaling and Th1 cell  
228 polarization, including TNF, STAT and T cell receptor signaling<sup>39,40</sup>. Collectively, our data indicate  
229 that NEC lesions gradually programmed the systemic immune system in preterm pigs to a state of  
230 immune suppression. The active inflammatory responses at earlier phases of NEC may consume  
231 most of the stored energy in the circulating immune cells, resulting in an exhausted and paralytic  
232 state at a later phase<sup>7</sup>. We postulate that NEC-induced systemic immune suppression may be an  
233 important contributing factor interacting with bacterial translocation across the compromised gut  
234 barrier to predispose NEC patients to increased risks of secondary infection and LOS<sup>20,21</sup>. The  
235 characteristics and mechanisms of immunosuppression induced by NEC may share some  
236 similarities to that of immunosuppressive status found in late stages of septic infants and elderly  
237 patients, which also predisposes those patients to secondary infection episodes and organ  
238 failures<sup>16,17</sup>.

239 It is also noteworthy that a series of genes from the transcriptomic profile related to glycolysis  
240 and TCA cycle (*PDHX*, *PDK3*, *ADPGK*, *PCK2*), oxidative phosphorylation and ATP synthesis  
241 (*CYP11B1* and genes involved in ATPase activities) consistently showed lower levels in pigs with  
242 vs. without NEC. This supports our postulation of NEC-induced energy deprivation in circulating  
243 immune cells with down-regulated pathways synthesizing ATP and decreased immune competence.  
244 Similar phenomena of impaired immunity and energy production-related pathways were observed  
245 in monocytes of preterm vs. term infants, as well as whole blood of preterm pigs born with vs.  
246 without prenatal inflammation<sup>9,24</sup>. It would be important to further elucidate the responses of NEC  
247 pigs to *in vivo* infection challenges in future studies to characterize in details their programmed

248 immunometabolic status and confirm their increased susceptibility to secondary infection and  
249 sepsis.

250         In conclusion, we demonstrated clear patterns of systemic immune suppression following  
251 NEC lesions in newborn preterm pigs. The effects were observed in animals with both mild and  
252 severe sub-clinical lesions. The current study provided important evidence for the compromised  
253 immune status in NEC patients, which may explain mechanisms of impaired immune defense to  
254 secondary infectious challenges and a proportion of NEC patients later developing one or more  
255 episodes of LOS. Finally, it is noteworthy that NEC occurrence in this study was mainly sub-  
256 clinical without manifestation into severe clinical symptoms, thereby reflecting a state of NEC  
257 suspicion or medical NEC in preterm infants. Still, our data suggest careful management of preterm  
258 infants with mild signs of gut dysfunction to avoid secondary infection due to the negative impact  
259 on the systemic immune system.

## 260 **Materials and Methods**

### 261 **Preterm pig experimental procedures and sample collection**

262 All animal procedures were approved by the Danish National Committee of Experimentation.  
263 A preterm pig cohort was set up with 113 pigs (Landrace x Yorkshire x Duroc) delivered by  
264 caesarean section at day 106 of gestation (~90%, term at d 117) from ten sows. After delivery, pigs  
265 were transferred to individual incubators with supplemental oxygen (0.5-2 L/min) for the first 24 h.  
266 Each pig was inserted a vascular catheter (4F, Portex, Kent, UK) via the umbilical artery for  
267 parenteral nutrition (Kabiven, Fresenius Kabi, Uppsala, Sweden) and blood sampling, and an  
268 orogastric catheter (6F, Portex) for enteral nutrition with milk diets (increasing amount of 16-112  
269 ml/kg/day of bovine colostrum or bovine milk-based formula, 3300-3500 KJ/L) until postnatal day  
270 (d) 9. To provide passive immunity, each pig received 16 mL/kg maternal plasma via the umbilical  
271 catheter during the first 24 h of life. Pigs were continuously monitor in individual incubator. On d 5,  
272 36 pigs from several litters were planned for euthanasia for gut tissue collection and macroscopic  
273 NEC diagnosis. The remaining pigs were reared until euthanasia at postnatal d 9. When severe NEC  
274 clinical symptoms appeared before the planned euthanasia, pigs were also euthanized according to  
275 humane endpoints. At euthanasia, gut tissues were dissected, and the small intestine was equally  
276 divided into three regions: proximal, middle and distal small intestine. Macroscopic lesions were  
277 scored based on a previously documented scoring system from 1 to 6, based on the degree and  
278 severity of hyperemia, edema, hemorrhage, pneumatosis and necrosis<sup>41</sup>. A pig with a score of three  
279 or higher in any of the small intestinal regions or colon was designated as NEC. A pig with the  
280 highest regional score of 3-4 and 5-6 was stratified as mild and severe NEC, respectively. Small  
281 intestinal and colonic tissues were snap-frozen or fixed in paraformaldehyde 4% for later analysis.  
282 Fixed tissues were embedded in paraffin and 5 µm sections were used for histology.

283 On d 5 and 9, blood samples were collected for all pigs from the arterial catheter. Fresh blood  
284 was used for hematology by an automatic cell counter (advia 2120i Hematology System, Siemens,  
285 Germany), flow cytometry, and *ex vivo* stimulation with LPS. Blood (200  $\mu$ l) were also mixed with  
286 520  $\mu$ l mixture of lysis/binding solution concentrate and isopropanol (MagMax 96 blood RNA  
287 isolation kit, Thermofisher, Roskilde, Denmark), and stored at  $-80^{\circ}\text{C}$  until RNA extraction for  
288 transcriptomics and qPCR analysis.

### 289 ***In vivo* test and gut tissue analysis**

290 Precisely three hours prior to the planned euthanasia, a gut permeability test was performed  
291 by enteral administration of a solution containing 5% (w/v) of lactulose and mannitol and urinary  
292 levels of these two molecules were measured at euthanasia as previously described<sup>41</sup>. Villus height  
293 and crypt depth in the three small intestinal regions were measured on images from H&E stained  
294 fixed tissues using Image J (National Institutes of Health, Bethesda, MD, USA)<sup>41</sup>. Colonic and  
295 distal small intestinal mucin-containing goblet cell density was determined following Alcian Blue  
296 and Periodic acid-Schiff staining as previously described<sup>42</sup>. Colon and distal small intestinal tissues  
297 were also stained for CD3 (T cell marker) and MPO (neutrophil/macrophage marker) for indication  
298 of inflammatory cell infiltration, using anti-porcine CD3 (Southern Biotech, Birmingham, AL,  
299 USA) and anti-human MPO (Agilent, Glostrup, Denmark). CD3 was quantified by positive cell area  
300 fraction using Image J, whereas MPO was graded from 1-7 according to cellular density (low,  
301 medium, high) and degree of tissue inflammation (none, focal, multifocal, diffuse, ulceration) by a  
302 blinded investigator. Cytokines (IL-8, IL-6, TNF- $\alpha$  and IL-1 $\beta$ ) in the frozen distal small intestine  
303 and colon were measured by porcine specific ELISA assays (R&D Systems, Abingdon, UK).

### 304 **Gut microbiome**

305 Enema samples (d 5) or colon content (d 9) of the same selected pigs reared to postnatal d 9  
306 from three litters were used for total DNA extraction (PowerSoil DNA isolation kit, MoBio  
307 Laboratories). Thereafter, 16S rRNA gene (V3 region) amplicon sequencing (Illumina, San Diego,

308 CA, USA) and downstream bioinformatics were performed as previously described<sup>43</sup>. Raw reads  
309 were analyzed and zero-radius operational taxonomic units (zOTUs) were constructed using  
310 UNOISE algorithm<sup>44</sup>. Sample counts were rarified to 4800 for calculation of alpha and beta  
311 diversity, and the unweighted and weighted Unifrac distance metrics were visualized by principal  
312 coordinate analysis (PCoA).

### 313 **Whole transcriptome shotgun sequencing**

314 Stored blood samples collected on d 9 from selected 8 NEC and 8 healthy pigs across 3 litters  
315 were used for RNA extraction using MagMax 96 blood RNA isolation kit (Thermofisher) for  
316 transcriptomics by whole transcriptome shotgun sequencing as previously described<sup>24</sup>. Briefly,  
317 sequencing libraries were constructed with NEBNext Ultra RNA Library Prep Kit for Illumina  
318 (New England Biolabs, Ipswich, MA, USA) and libraries were sequenced using Illumina HiSeq  
319 4000 platform (Illumina). After that, 150 bp paired-end raw reads were trimmed and then were  
320 aligned to the Sscrofa 11.1 genome using TopHat<sup>45</sup>, and gene information was obtained from  
321 Ensembl ([www.ensembl.org/Sus\\_scrofa/Info/Index](http://www.ensembl.org/Sus_scrofa/Info/Index)). Gene counts were generated and differentially  
322 expressed genes (DEGs) between pigs with vs. without NEC with cutoff q values < 0.05 using  
323 DESeq2<sup>46</sup>. Lists of DEGs with mean expression levels and adjusted P values were listed in  
324 Supplementary Table S1. Biological process and KEGG pathway enrichment was performed using  
325 DAVID Bioinformatics Resources, with cutoff of adjusted P values < 0.05 for enriched pathways  
326 (Supplementary Table S2).

### 327 **Immune assays with whole blood LPS stimulation, neutrophil phagocytosis and cell profiling**

328 Fresh blood samples on d 5 and 9 (200 µl) was stimulated with LPS (1 µg/mL, O127:B8 from  
329 *E.coli*, SigmaAldrich) for 5 h at 37°C and 5% CO<sub>2</sub>. After stimulation, a fraction of blood was mixed  
330 with the lysis/binding solution prepared in isopropanol (Thermofisher) and stored at -80°C for  
331 qPCR. The other fraction of blood was centrifuged (2000 x g, 10 min, 4°C) and plasma was  
332 analyzed for TNF- $\alpha$  and IL-10 (porcine specific ELISA kit, R&D Systems, Abingdon, UK). For

333 qPCR, blood RNA was extracted and converted into cDNA<sup>47,48</sup>, and qPCR for a panel of selected  
334 23 genes related to innate, adaptive immunity and cellular metabolism was performed using  
335 QuantiTect SYBR Green PCR kit (Qiagen) on LightCycler 480 (Roche). Relative gene expression  
336 was normalized to the housekeeping gene *HPRT1*. Primer-Blast  
337 (<http://ncbi.nlm.nih.gov/tools/primer-blast>) were used to design primers and their sequences were  
338 described in Supplemental Table S3.

339 Fresh blood samples on d 5 and 9 were also analyzed for neutrophil phagocytosis function  
340 and T cell subset profiling. Phagocytosis assay was performed with 100  $\mu$ l blood using the pHrodo  
341 Red E.coli (560/585 nm) Bioparticles Phagocytosis Kit for Flow cytometry (ThermoFisher,  
342 Roskilde, Denmark) and the Accuri C6 flow cytometer<sup>43</sup>. pHrodo<sup>+</sup> neutrophils were identified as  
343 neutrophils exerting phagocytosis while median fluorescence intensity of pHrodo<sup>+</sup> neutrophils  
344 demonstrated phagocytic capacity (number of bacteria being engulfed). T cell subset profiling was  
345 performed flow cytometry<sup>24,49</sup>. Following erythrocyte lysis (10 x BD FACS Lysing solution diluted  
346 with sterile water, BD Biosciences, Lyngby, Denmark), leukocyte permeabilization  
347 (Fixation/Permeabilization buffer, for 30 min at 4°C in the dark, washed twice by permeabilization  
348 buffer, all from ThermoFisher), Fc receptor blocking (porcine serum for 15 min at 4°C in the dark),  
349 leukocytes were stained with a mixture of 4 antibodies: PerCP-Cy5.5 conjugated anti-pig CD3  
350 antibody, FITC-conjugated anti-pig CD4 antibody, PE-conjugated anti-pig CD8 antibody (all three  
351 from Biorad, Copenhagen, Denmark), and APC-conjugated anti-mouse/rat Foxp3 antibody  
352 (ThermoFisher). Corresponding negative controls were used as isotype controls. Stained cells were  
353 analyzed by Accuri C6 flow cytometer (BD Biosciences). The following T cell subsets were  
354 identified: helper T cells (Th, CD3<sup>+</sup>CD4<sup>+</sup>CD8<sup>-</sup> lymphocytes), cytotoxic T cells (Tc, CD3<sup>+</sup>CD4<sup>-</sup>  
355 CD8<sup>+</sup> lymphocytes) and regulatory T cells (Treg, CD3<sup>+</sup>CD4<sup>+</sup>Foxp3<sup>+</sup> lymphocytes).

## 356 **Statistics**



357 All statistics were performed using R, version 3.4.3. Categorical data (NEC incidence) were  
358 analyzed using Fisher's exact test. Continuous data (except transcriptomic and gut microbiome  
359 data) were analyzed by linear models with NEC (no NEC vs. NEC; or no NEC vs. mild NEC vs.  
360 severe NEC) and litters as fixed effects using lmer functions. Post-hoc Tukey tests were used when  
361 comparing groups with different NEC severities. Data were log transformed if necessary. Residuals  
362 and fitted values were evaluated for normal distribution and variance homogeneity. P values < 0.05  
363 were regarded as statistical significance and P values in the range of 0.05-0.1 were considered as  
364 tendencies of being significant. For transcriptomic data, heatmaps were generated by heatmap.3  
365 function. To identify hub-genes among DEGs between pigs with vs. without NEC, all DEGs were  
366 analyzed for correlation (Spearman) and significant correlations (Spearman's Rho > 0.8 and  
367 adjusted P-value < 0.05) were further analyzed for degree of interactions and betweenness centrality  
368 (Cytoscape).

369

### 370 **Author contributions**

371 DNN designed the study. DNN, SR, YH and XP carried out the experiments and laboratory  
372 analysis. SR, YH and XP performed data analysis. SR and DNN wrote the manuscript. SR, YH, FG,  
373 DN, PTS and DNN provided critical interpretation and revised the manuscript. SR and DNN had  
374 primary responsibility for the final content and all authors approved the final paper.

375

### 376 **Acknowledgement**

377 The authors would like to thank Thomas Thymann, Yanqi Li, Anders Brunse, Elin Skytte, Jan  
378 C. Povlsen, Kristina Møller and Brita Karlsson for the assistance in pig experiments and analyses.  
379 The study was supported from the STIMMUNE and NEOCOL projects granted by the Arla Food

380 for Health (DNN and PTS) and Innovation Foundation Denmark (PTS), respectively. The authors  
381 declare no conflicts of interest.

382

## 383 **References**

- 384 1 Strunk T, Inder T, Wang X, Burgner D, Mallard C, Levy O. Infection-induced inflammation  
385 and cerebral injury in preterm infants. *Lancet Infect Dis* 2014; **14**: 751–762.
- 386 2 Miller JE, Hammond GC, Strunk T, Moore HC, Leonard H, Carter KW *et al.* Association of  
387 gestational age and growth measures at birth with infection-related admissions to hospital  
388 throughout childhood: a population-based, data-linkage study from Western Australia. *Lancet*  
389 *Infect Dis* 2016; **16**: 952–961.
- 390 3 Nguyen DN, Jiang P, Frøkiær H, Heegaard PMH, Thymann T, Sangild PT. Delayed  
391 development of systemic immunity in preterm pigs as a model for preterm infants. *Sci Rep*  
392 2016; **6**: 36816.
- 393 4 Sangild PT, Thymann T, Schmidt M, Stoll B, Burrin DG, Buddington RK. Invited review: the  
394 preterm pig as a model in pediatric gastroenterology. *J Anim Sci* 2013; **91**: 4713–4729.
- 395 5 Østergaard MV, Cilieborg MS, Skovgaard K, Schmidt M, Sangild PT, Bering SB. Preterm birth  
396 reduces nutrient absorption with limited effect on immune gene expression and gut colonization  
397 in pigs. *J Pediatr Gastroenterol Nutr* 2015. **61**:481-490.
- 398 6 Denning TL, Bhatia AM, Kane AF, Patel RM, Denning PL. Pathogenesis of NEC: Role of the  
399 Innate and Adaptive Immune Response. *Semin Perinatol* 2017; **41**: 15–28.
- 400 7 Harbeson D, Francis F, Bao W, Amenyogbe NA, Kollmann TR. Energy Demands of Early Life  
401 Drive a Disease Tolerant Phenotype and Dictate Outcome in Neonatal Bacterial Sepsis. *Front*  
402 *Immunol* 2018; **9**:1918.
- 403 8 Harbeson D, Ben-Othman R, Amenyogbe N, Kollmann TR. Outgrowing the Immaturity Myth:  
404 The Cost of Defending From Neonatal Infectious Disease. *Front Immunol* 2018; **9**: 1077.
- 405 9 Kan B, Michalski C, Fu H, Au HHT, Lee K, Marchant EA *et al.* Cellular metabolism constrains  
406 innate immune responses in early human ontogeny. *Nature Communications* 2018; **9**: 4822.
- 407 10 Stewart CJ, Embleton ND, Marrs ECL, Smith DP, Nelson A, Abdulkadir B *et al.* Temporal  
408 bacterial and metabolic development of the preterm gut reveals specific signatures in health and  
409 disease. *Microbiome* 2016; **4**: 67.
- 410 11 Nguyen DN, Sangild PT. Pathogenesis and biomarkers for necrotizing enterocolitis: Getting  
411 any closer? *EBioMedicine* 2019; **45**: 13–14.
- 412 12 Ma F, Li S, Gao X, Zhou J, Zhu X, Wang D *et al.* Interleukin-6-mediated CCR9+ interleukin-  
413 17-producing regulatory T cells polarization increases the severity of necrotizing enterocolitis.  
414 *EBioMedicine* 2019; **44**: 71–85.

- 415 13 Martin CR, Bellomy M, Allred EN, Fichorova RN, Leviton A. Systemic inflammation  
416 associated with severe intestinal injury in extremely low gestational age newborns. *Fetal &*  
417 *Pediatric Pathology* 2012; **32**: 222-234.
- 418 14 Maheshwari A, Schelonka RL, Dimmitt RA, Carlo WA, Munoz-Hernandez B, Das A *et al.*  
419 Cytokines Associated with Necrotizing Enterocolitis in Extremely Low Birth Weight Infants.  
420 *Pediatr Res* 2014; **76**: 100–108.
- 421 15 Ng PC, Ang IL, Chiu RWK, Li K, Lam HS, Wong RPO *et al.* Host-response biomarkers for  
422 diagnosis of late-onset septicemia and necrotizing enterocolitis in preterm infants. *J Clin Invest*  
423 2010; **120**: 2989–3000.
- 424 16 Hibbert JE, Currie A, Strunk T. Sepsis-Induced Immunosuppression in Neonates. *Front Pediatr*  
425 2018; **6**: 357.
- 426 17 Boomer JS, To K, Chang KC, Takasu O, Osborne DF, Walton AH *et al.* Immunosuppression in  
427 patients who die of sepsis and multiple organ failure. *JAMA* 2011; **306**: 2594–2605.
- 428 18 Cotten CM, Taylor S, Stoll B, Goldberg RN, Hansen NI, Sánchez PJ *et al.* Prolonged duration  
429 of initial empirical antibiotic treatment is associated with increased rates of necrotizing  
430 enterocolitis and death for extremely low birth weight infants. *Pediatrics* 2009; **123**: 58–66.
- 431 19 Bury RG, Tudehope D. Enteral antibiotics for preventing necrotizing enterocolitis in low  
432 birthweight or preterm infants. *Cochrane Database Syst Rev* 2001; : CD000405.
- 433 20 Stewart CJ, Marrs ECL, Nelson A, Lanyon C, Perry JD, Embleton ND *et al.* Development of  
434 the preterm gut microbiome in twins at risk of necrotising enterocolitis and sepsis. *PLoS ONE*  
435 2013; **8**: e73465.
- 436 21 Stewart CJ, Marrs ECL, Magorrian S, Nelson A, Lanyon C, Perry JD *et al.* The preterm gut  
437 microbiota: changes associated with necrotizing enterocolitis and infection. *Acta Paediatr* 2012;  
438 **101**: 1121–1127.
- 439 22 Khosravi A, Yáñez A, Price JG, Chow A, Merad M, Goodridge HS *et al.* Gut microbiota  
440 promote hematopoiesis to control bacterial infection. *Cell Host Microbe* 2014; **15**: 374–381.
- 441 23 Deshmukh HS, Liu Y, Menkiti OR, Mei J, Dai N, O’Leary CE *et al.* The microbiota regulates  
442 neutrophil homeostasis and host resistance to *Escherichia coli* K1 sepsis in neonatal mice. *Nat*  
443 *Med* 2014; **20**: 524–530.
- 444 24 Ren S, Pan X, Gao F, Sangild PT, Nguyen DN. Prenatal inflammation suppresses blood Th1  
445 polarization and gene clusters related to cellular energy metabolism in preterm newborns.  
446 *FASEB J* 2020; **34**: 2896–2911.
- 447 25 Li Y, Pan X, Nguyen DN, Ren S, Moodley A, Sangild PT. Bovine Colostrum Before or After  
448 Formula Feeding Improves Systemic Immune Protection and Gut Function in Newborn Preterm  
449 Pigs. *Front Immunol* 2020; **10**: 3062.
- 450 26 Robinson JR, Rellinger EJ, Hatch LD, Weitkamp J-H, Speck KE, Danko M *et al.* Surgical  
451 necrotizing enterocolitis. *Seminars in Perinatology* 2017; **41**: 70–79.

- 452 27 Holman RC, Stoll BJ, Curns AT, Yorita KL, Steiner CA, Schonberger LB. Necrotising  
453 enterocolitis hospitalisations among neonates in the United States. *Paediatric and Perinatal*  
454 *Epidemiology* 2006; **20**: 498–506.
- 455 28 Warner BB, Deych E, Zhou Y, Hall-Moore C, Weinstock GM, Sodergren E *et al.* Gut bacteria  
456 dysbiosis and necrotising enterocolitis in very low birthweight infants: a prospective case-  
457 control study. *Lancet* 2016; **387**: 1928–1936.
- 458 29 Basu S. Neonatal sepsis: the gut connection. *Eur J Clin Microbiol Infect Dis* 2015; **34**: 215–  
459 222.
- 460 30 Deitch EA. Gut-origin sepsis: Evolution of a concept. *The Surgeon* 2012; **10**: 350–356.
- 461 31 Birck MM, Nguyen DN, Cilieborg MS, Kamal SS, Nielsen DS, Damborg P *et al.* Enteral but  
462 not parenteral antibiotics enhance gut function and prevent necrotizing enterocolitis in formula-  
463 fed newborn preterm pigs. *Am J Physiol Gastrointest Liver Physiol* 2016; **310**: G323-333.
- 464 32 Singer JR, Blosser EG, Zindl CL, Silberger DJ, Conlan S, Laufer VA *et al.* Preventing  
465 dysbiosis of the neonatal mouse intestinal microbiome protects against late-onset sepsis. *Nature*  
466 *Medicine* 2019; **25**: 1772–1782.
- 467 33 Lu P, Sodhi CP, Jia H, Shaffiey S, Good M, Branca MF *et al.* Animal Models of Necrotizing  
468 Enterocolitis □: Pathophysiology, Translational Relevance and Challenges. *Am J Physiol*  
469 *Gastrointest Liver Physiol* 2014. **306**: G917-928.
- 470 34 Egan CE, Sodhi CP, Good M, Lin J, Jia H, Yamaguchi Y *et al.* Toll-like receptor 4-mediated  
471 lymphocyte influx induces neonatal necrotizing enterocolitis. *J Clin Invest* 2016; **126**: 495–508.
- 472 35 Neu J, Walker WA. Necrotizing enterocolitis. *N Engl J Med* 2011; **364**: 255–264.
- 473 36 Weitkamp J-H, Koyama T, Rock MT, Correa H, Goettel JA, Matta P *et al.* Necrotising  
474 enterocolitis is characterised by disrupted immune regulation and diminished mucosal  
475 regulatory (FOXP3)/effector (CD4, CD8) T cell ratios. *Gut* 2013; **62**: 73–82.
- 476 37 Qazi KR, Jensen GB, Heiden M van der, Björkander S, Holmlund U, Haileselassie Y *et al.*  
477 Extremely Preterm Infants Have Significant Alterations in Their Conventional T Cell  
478 Compartment during the First Weeks of Life. *The Journal of Immunology* 2020; **204**: 68–77.
- 479 38 Schreurs RRCE, Baumdick ME, Sagebiel AF, Kaufmann M, Mokry M, Klarenbeek PL *et al.*  
480 Human Fetal TNF- $\alpha$ -Cytokine-Producing CD4+ Effector Memory T Cells Promote Intestinal  
481 Development and Mediate Inflammation Early in Life. *Immunity* 2019; **50**: 462-476.e8.
- 482 39 Owen DL, Farrar MA. STAT5 and CD4+ T Cell Immunity. *F1000Res* 2017; **6**: 32.
- 483 40 Levy O. Innate immunity of the newborn: basic mechanisms and clinical correlates. *Nat Rev*  
484 *Immunol* 2007; **7**: 379–390.
- 485 41 Li Y, Jensen ML, Chatterton DEW, Jensen BB, Thyman T, Kvistgaard AS *et al.* Raw bovine  
486 milk improves gut responses to feeding relative to infant formula in preterm piglets. *Am J*  
487 *Physiol Gastrointest Liver Physiol* 2014; **306**: G81-90.

- 488 42 Li Y, Nguyen DN, Obelitz-Ryom K, Andersen AD, Thymann T, Chatterton DEW *et al.*  
489 Bioactive Whey Protein Concentrate and Lactose Stimulate Gut Function in Formula-fed  
490 Preterm Pigs. *J Pediatr Gastroenterol Nutr* 2018; **66**: 128–134.
- 491 43 Ren S, Hui Y, Goericke-Pesch S, Pankratova S, Kot W, Pan X *et al.* Gut and immune effects of  
492 bioactive milk factors in preterm pigs exposed to prenatal inflammation. *Am J Physiol*  
493 *Gastrointest Liver Physiol* 2019. 317: G67-77.
- 494 44 Rognes T, Flouri T, Nichols B, Quince C, Mahé F. VSEARCH: a versatile open source tool for  
495 metagenomics. *PeerJ* 2016; **4**: e2584.
- 496 45 Trapnell C, Pachter L, Salzberg SL. TopHat: discovering splice junctions with RNA-Seq.  
497 *Bioinformatics* 2009; **25**: 1105–1111.
- 498 46 Love MI, Huber W, Anders S. Moderated estimation of fold change and dispersion for RNA-  
499 seq data with DESeq2. *Genome Biol* 2014; **15**: 550.
- 500 47 Mærkedahl RB, Frøkiær H, Lauritzen L, Metzdorff SB. Evaluation of a low-cost procedure for  
501 sampling, long-term storage, and extraction of RNA from blood for qPCR analyses. *Clin Chem*  
502 *Lab Med* 2015. **53**: 1181-1188.
- 503 48 Nguyen DN, Fuglsang E, Jiang P, Birck MM, Pan X, Kamal SB *et al.* Oral antibiotics increase  
504 blood neutrophil maturation and reduce bacteremia and necrotizing enterocolitis in the  
505 immediate postnatal period of preterm pigs. *Innate Immunity* 2016; **22**: 51–62.
- 506 49 Nguyen DN, Thymann T, Goericke-Pesch SK, Ren S, Wei W, Skovgaard K *et al.* Prenatal  
507 Intra-Amniotic Endotoxin Induces Fetal Gut and Lung Immune Responses and Postnatal  
508 Systemic Inflammation in Preterm Pigs. *Am J Pathol* 2018; **188**: 2629–2643.
- 509

## 510 **Figure legends**

511 **Figure 1.** Incidence of NEC and related gut parameters. NEC score, overall incidence of NEC and  
512 incidence of mild and severe NEC (A-B). Gut permeability (C, n = 6-9 and 8-22 on d 5 and 9,  
513 respectively). Cytokines in the distal small intestine and colon (D-E, n=4-6 and 5-14 on d 5 and 9,  
514 respectively). Villus height and crypt depth (F-G, n = 7-15 and 9-27 on d 5 and 9, respectively).  
515 Values in B-F are means  $\pm$  SEM. \* and \*\* P < 0.05 and 0.01, respectively. # P < 0.1.

516 **Figure 2.** Gut histology in the distal small intestine and colon. Goblet cell density (A-D, n = 7-15  
517 and 16-32 on d 5 and 9, respectively). MPO-positive cells (E-H, n = 4-14 and 5-14 on d 5 and 9,  
518 respectively). CD3 positive cells (I-L, n = 5-14 on d 5 and 9). Values in D, H, L are means  $\pm$  SEM.  
519 \*, \*\* P < 0.05 and 0.01, respectively. # P < 0.1. Lines in scale bars represent 200  $\mu$ m.

520 **Figure 3.** Colonic microbiome via 16S rRNA gene amplicon sequencing. (A) Shannon alpha  
521 diversity. (B-C) PCoA based on unweighted and weighted Unifrac distance metrics. (D) Relative  
522 bacterial abundance. n = 3-5 on d 5 and 12 on d 9. Labels with Y and N indicate pigs with and  
523 without NEC, respectively.

524 **Figure 4.** Systemic immune status associated with NEC. Blood neutrophils (A, n=13-27 and 14-21  
525 on d 5 and 9). Blood neutrophil phagocytosis (B, n=5-14 and 4-10 on d 5 and 9). Plasma TNF- $\alpha$  and  
526 IL-10 without and with LPS stimulation (C-D, n= 5-13 and 4-9 on d 5 and 9). Blood regulatory T  
527 cells (Treg, E, n=15-26 and 11-16 on d 5 and 9). Serum glucose (F, n=3-10 and 9-28 on d 5 and 9).  
528 Values are means  $\pm$  SEM. \*, \*\*, \*\*\* P < 0.05, 0.01 and 0.001, respectively.

529 **Figure 5.** Blood gene expressions in LPS-stimulated whole blood of pigs with and without NEC.  
530 Innate (A) and adaptive (B) immunity-related genes. n=3-9 in each group on d 5 and 9. Values are  
531 means  $\pm$  SEM. \*, \*\*, \*\*\* P < 0.05, 0.01 and 0.001, respectively, relative to the corresponding  
532 controls without LPS stimulation. #, ## P < 0.05 and 0.01 between the indicated groups.

533 **Figure 6.** Blood transcriptomic profiles in pigs with and without NEC on d 9. Expression heatmap  
534 with differentially expressed genes (DEGs) between pigs with and without NEC (A). Top 20  
535 enriched pathways from down-regulated genes in NEC pigs with FDR adjusted P values and  
536 number of genes involved in each enriched pathway (B). Expression levels of top 10 identified hub-  
537 genes among all DEGs between pigs without and with NEC (C) and genes related to immune  
538 suppression up-regulated in NEC pigs (D). n = 5 in each group of NEC or no NEC, with or without  
539 LPS stimulation. Values in D-E are means  $\pm$  SEM. \*\*, \*\*\* P < 0.01 and 0.001, respectively.

540



**A**

Score 1

Score 2

Score 3

Score 4

Score 5

Score 6

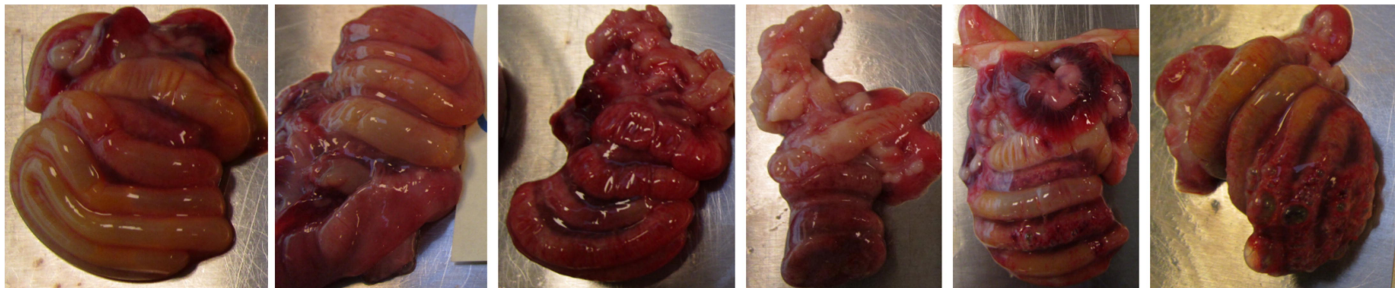**B**

NEC incidence

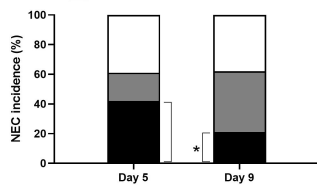**D**

Distal small intestinal cytokines

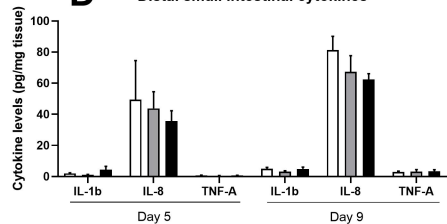**F**

Villus Height

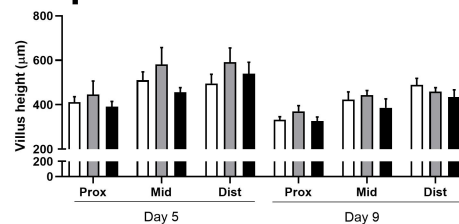**C**

Gut permeability

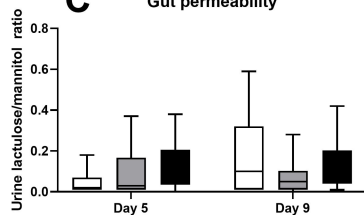**E**

Colon Cytokines

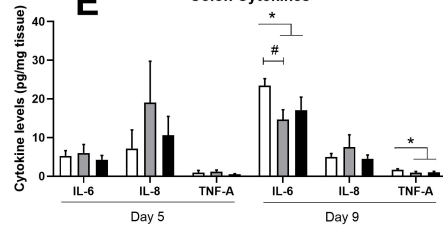**G**

Crypt Depth

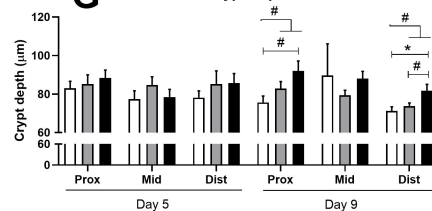

□ No NEC

■ Mild NEC

■ Severe NEC



D5 colon- no NEC

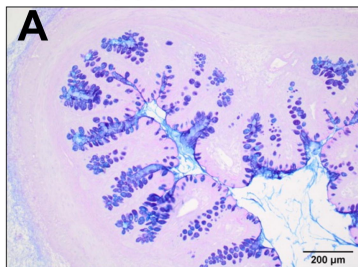

D5 colon- mild NEC

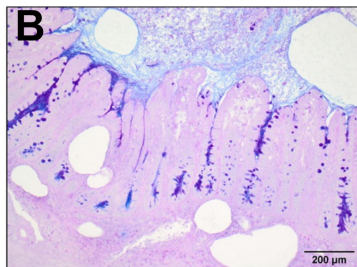

D5 colon- severe NEC

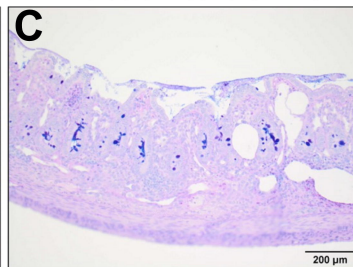**D**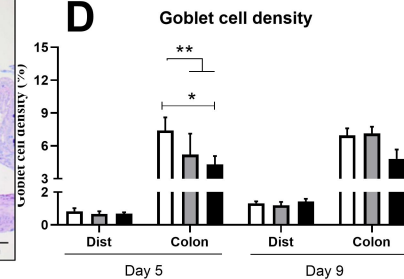

D9 colon- no NEC

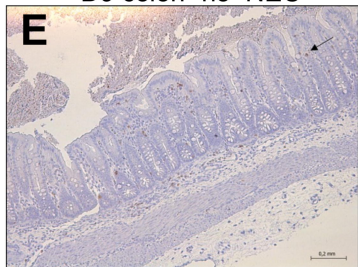

D9 colon- mild NEC

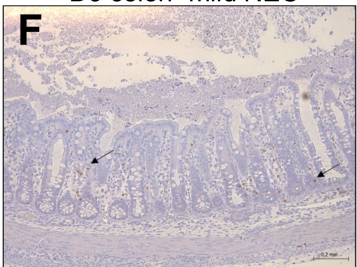

D9 colon- severe NEC

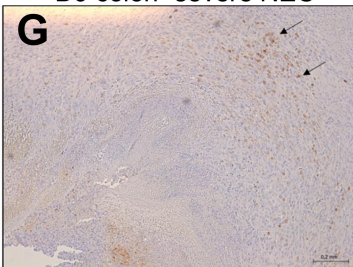**H**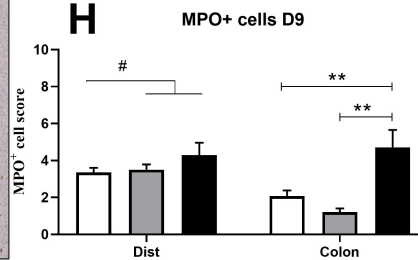

D9 colon- no NEC

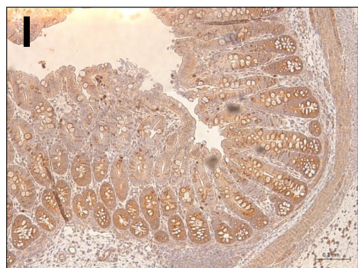

D9 colon- mild NEC

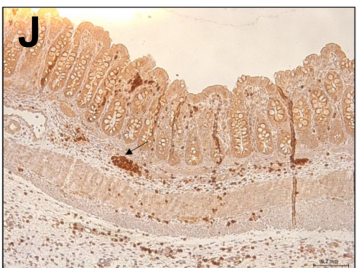

D9 colon- severe NEC

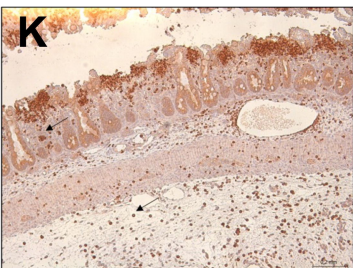**L**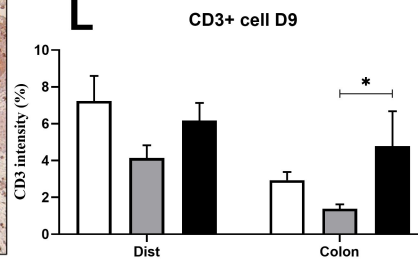

□ No NEC

■ Mild NEC

■ Severe NEC

### A Shannon alpha diversity

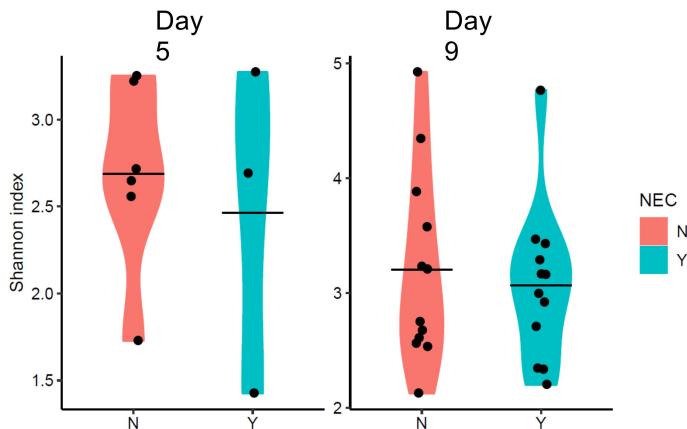

### B Unweighted PCoA (NEC: $R^2 = 0.04$ ; $P = 0.3$ )

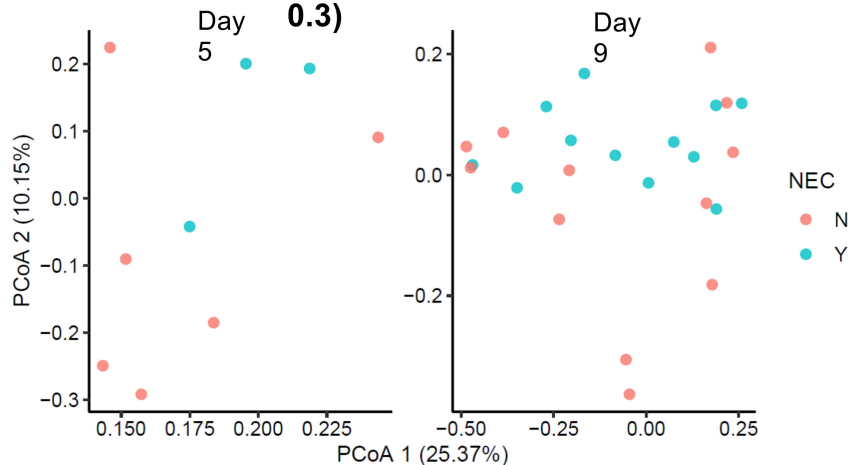

### C Weighted PCoA (NEC: $R^2 = 0.01$ ; $P = 0.8$ )

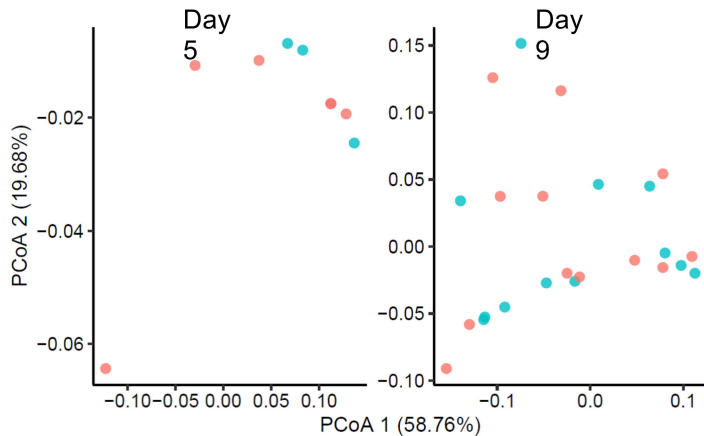

### D Bacterial abundance

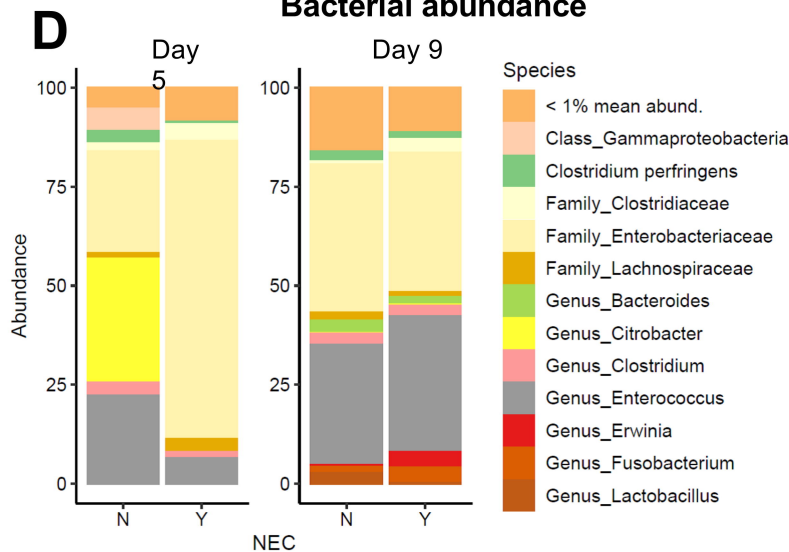

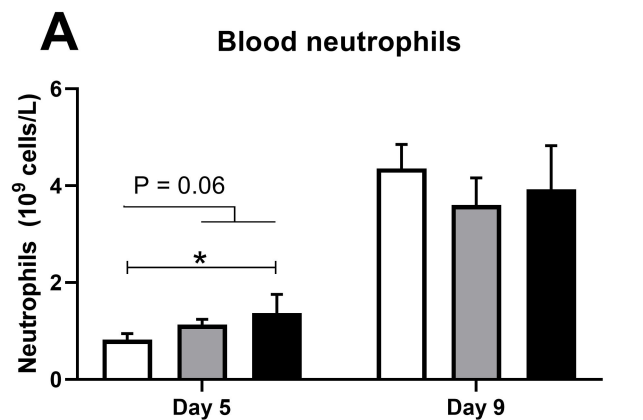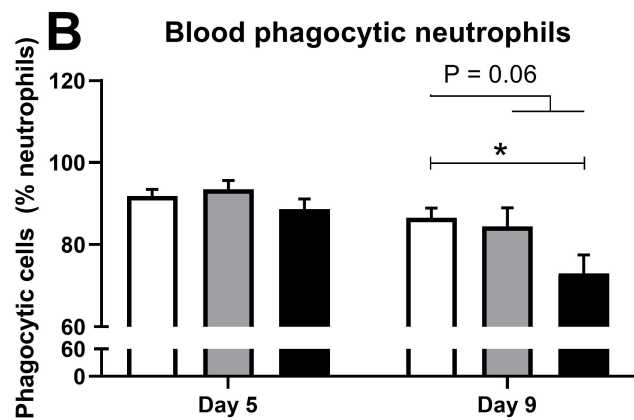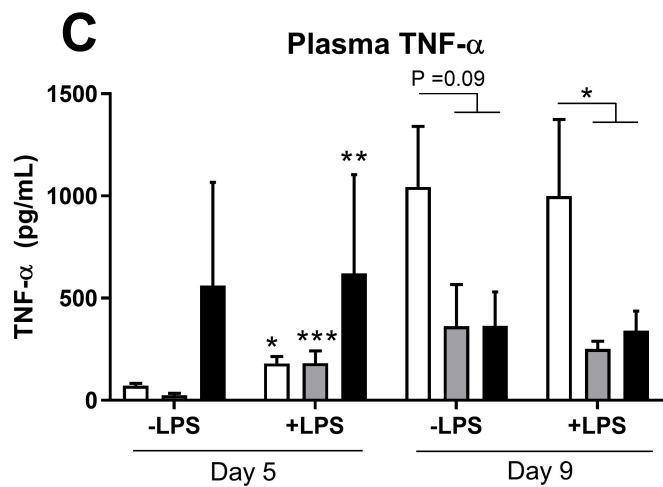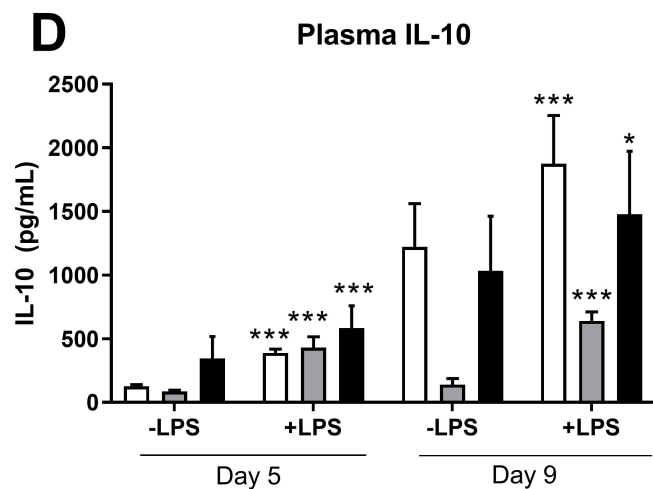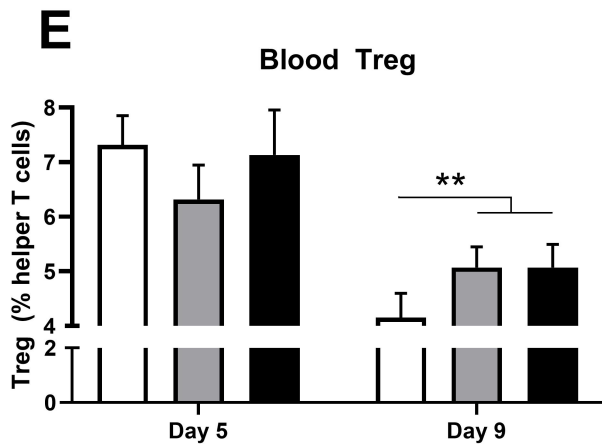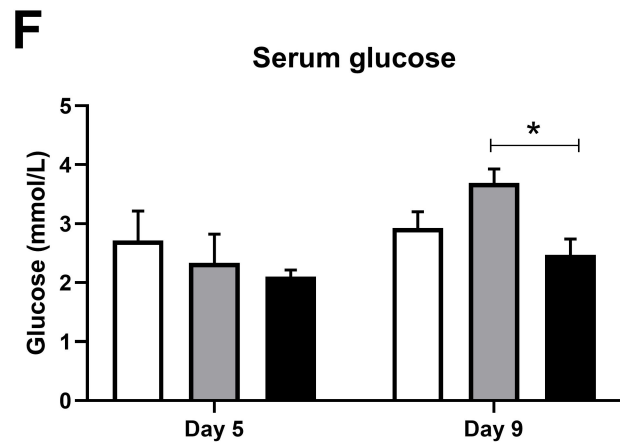

□ No NEC

■ Mild NEC

■ Severe NEC

**A**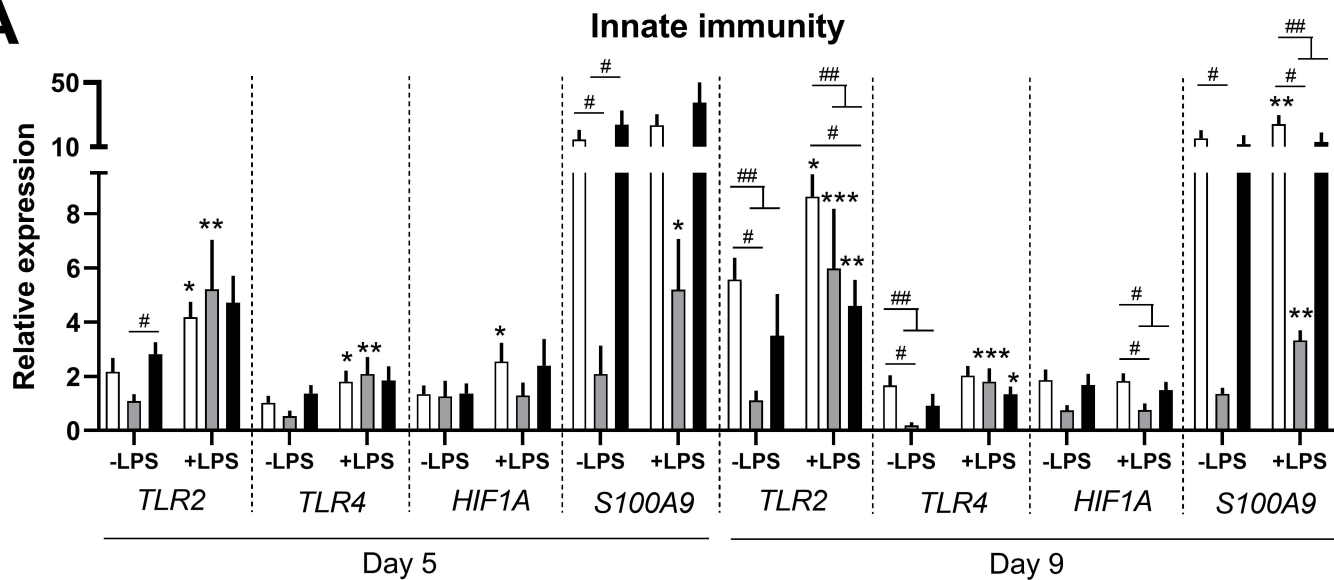**B**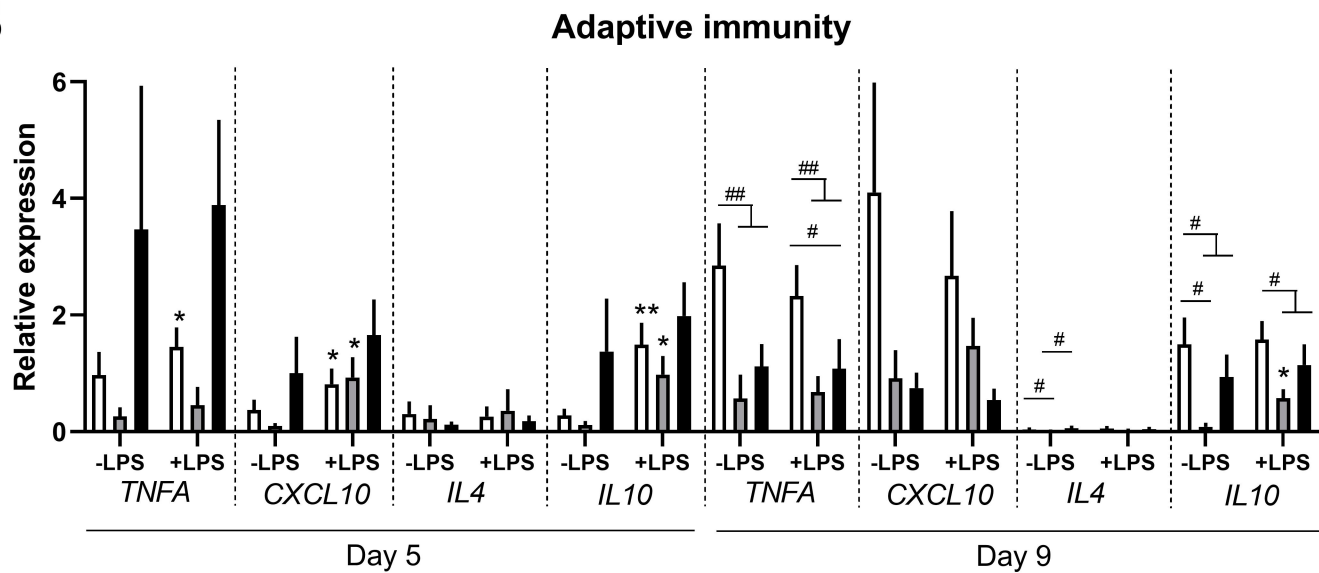

□ No NEC

▒ Mild NEC

■ Severe NEC

**A**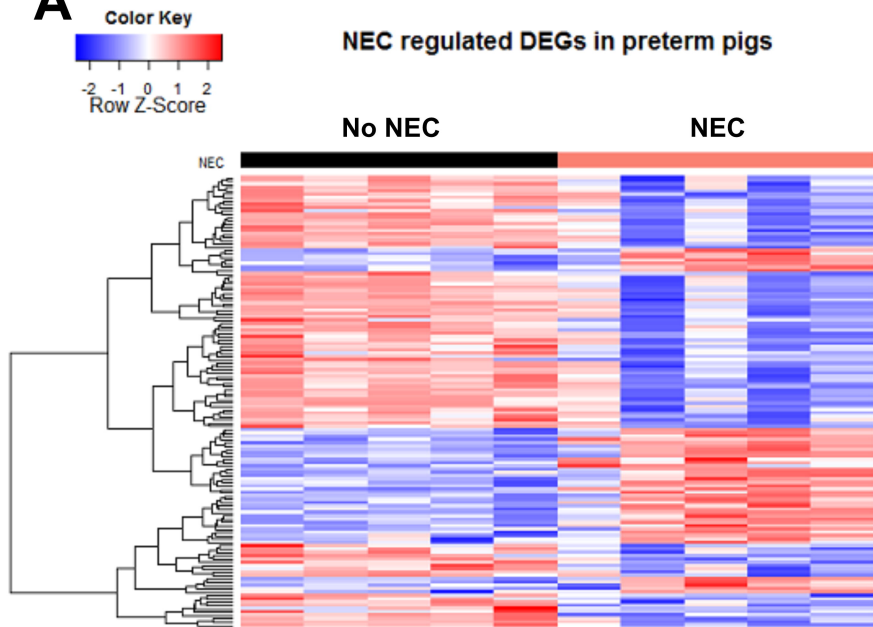**B**

| Enriched pathways                      | P values | Numbers of DEGs |
|----------------------------------------|----------|-----------------|
| TNF signaling pathway                  | 1.4 E-5  | 12              |
| JAK-STAT signaling pathway             | 3.4 E-5  | 13              |
| Cytokine-cytokine receptor interaction | 7.6 E-5  | 15              |
| Viral carcinogenesis                   | 1.3 E-4  | 14              |
| Inflammatory bowel disease (IBD)       | 2.6 E-4  | 8               |
| T cell receptor signaling pathway      | 2.9 E-4  | 10              |
| Toxoplasmosis                          | 3.3 E-4  | 10              |
| Chemokine signaling pathway            | 9.8 E-4  | 12              |
| Tuberculosis                           | 1.0 E-3  | 12              |
| Hepatitis B                            | 1.2 E-3  | 11              |

**C**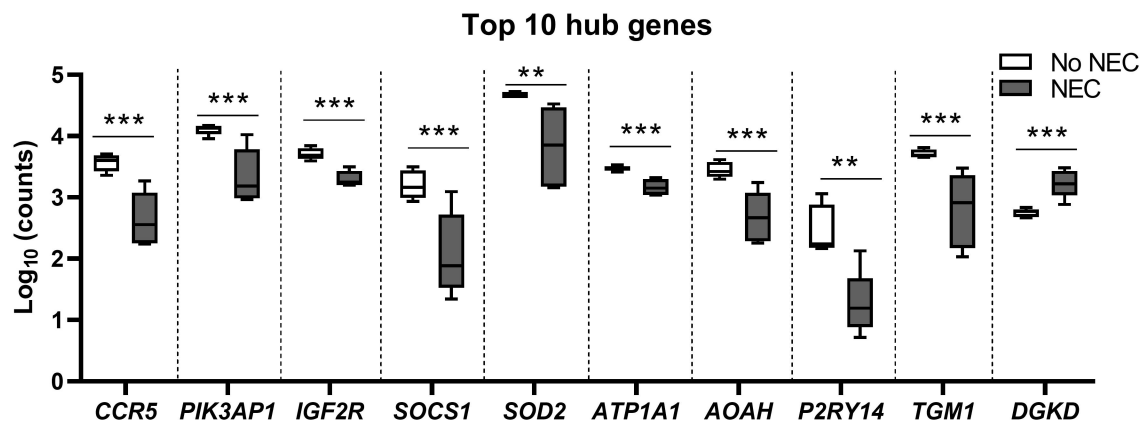**D**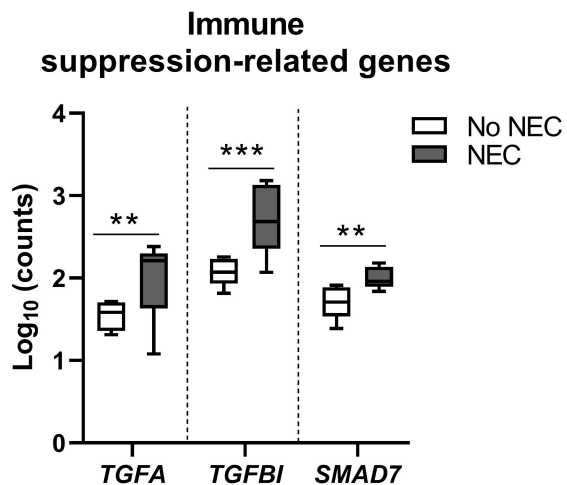

Source: http://biorxiv.org/content/10.1101/2020.09.21.306290v1.full.pdf
